# Supplementary material for: Lignocellulosic-Based Materials from Bean and Pistachio Pod Wastes for Dye-Contaminated Water Treatment: Optimization and Modeling of Indigo Carmine Sorption
Source: MDPI journal article supplement (doi:10.3390/polym14183776), 2022-09-09
Supplement: s1 [file s1]

# Lignocellulosic-Based Materials from Bean and Pistachio Pod Wastes for Dye-Contaminated Water Treatment: Optimization and Modeling of Indigo Carmine Sorption

Gaël Ferdinand Kazé Nindjio <sup>1</sup>, Rufis Fregue Tiegam Tagne <sup>2</sup>, Sherman Lesly Zambou Jiokeng <sup>1,3</sup>, Cyrille Ghislain Fotsop <sup>4</sup>, Aurelien Bopda <sup>1</sup>, Giscard Doungmo <sup>5</sup>, Ranil Clément Tonleu Temgoua <sup>1,6</sup>, Ingo Doench <sup>7,8,9</sup>, Estella Tamungang Njoyim <sup>1,10</sup>, Arnaud Kamdem Tamo <sup>7,8,9,\*</sup>, Anayancy Osorio-Madrado <sup>7,8,9,\*</sup>, Ignas Kenfack Tonle <sup>1,\*</sup>

<sup>1</sup> Research Unit of Noxious Chemistry and Environmental Engineering, Department of Chemistry, University of Dschang, P.O.Box. 67 Dschang, Cameroon

<sup>2</sup> Department of Paper Sciences and Bioenergy, University Institute of Wood Technology, University of Yaoundé I, Mbalmayo, P.O.Box. 306, Cameroon

<sup>3</sup> Institut für Anorganische Chemie und Strukturchemie, Heinrich-Heine-Universität Düsseldorf, 40204 Düsseldorf, Germany

<sup>4</sup> Otto-von-Guericke-University Magdeburg, Chemical Institute Industrial Chemistry, Universitätsplatz 2, 39106 Magdeburg, Germany

<sup>5</sup> Institut für Anorganische Chemie, Christian-Albrechts-Universität zu Kiel, Max-Eyth-Str. 2, 24118, Kiel, Germany

<sup>6</sup> Higher Teacher Training College, University of Yaoundé I, Yaoundé P.O. Box 47, Cameroon

<sup>7</sup> Laboratory for Bioinspired Materials BMBT, Institute of Microsystems Engineering IMTEK-Sensors, University of Freiburg, 79110 Freiburg, Germany

<sup>8</sup> Freiburg Center for Interactive Materials and Bioinspired Technologies FIT, University of Freiburg, 79110 Freiburg, Germany;

<sup>9</sup> Freiburg Materials Research Center FMF, University of Freiburg, 79104 Freiburg, Germany

<sup>10</sup> Department of Chemistry, Higher Teacher Training College, University of Bamenda, Bambili P.O.Box. 39, Cameroon

Correspondence: arnaud.kamdem@imtek.uni-freiburg.de (A.K.T.); anayancy.osorio@imtek.uni-freiburg.de (A.O.-M.); ignas.tonle@univ-dschang.org (I.K.T.); Tel.: +49-761-203-95096 (A.K.T.); +49-761-203-67363 (A.O.-M.); +237-696-141-545 (I.K.T.)

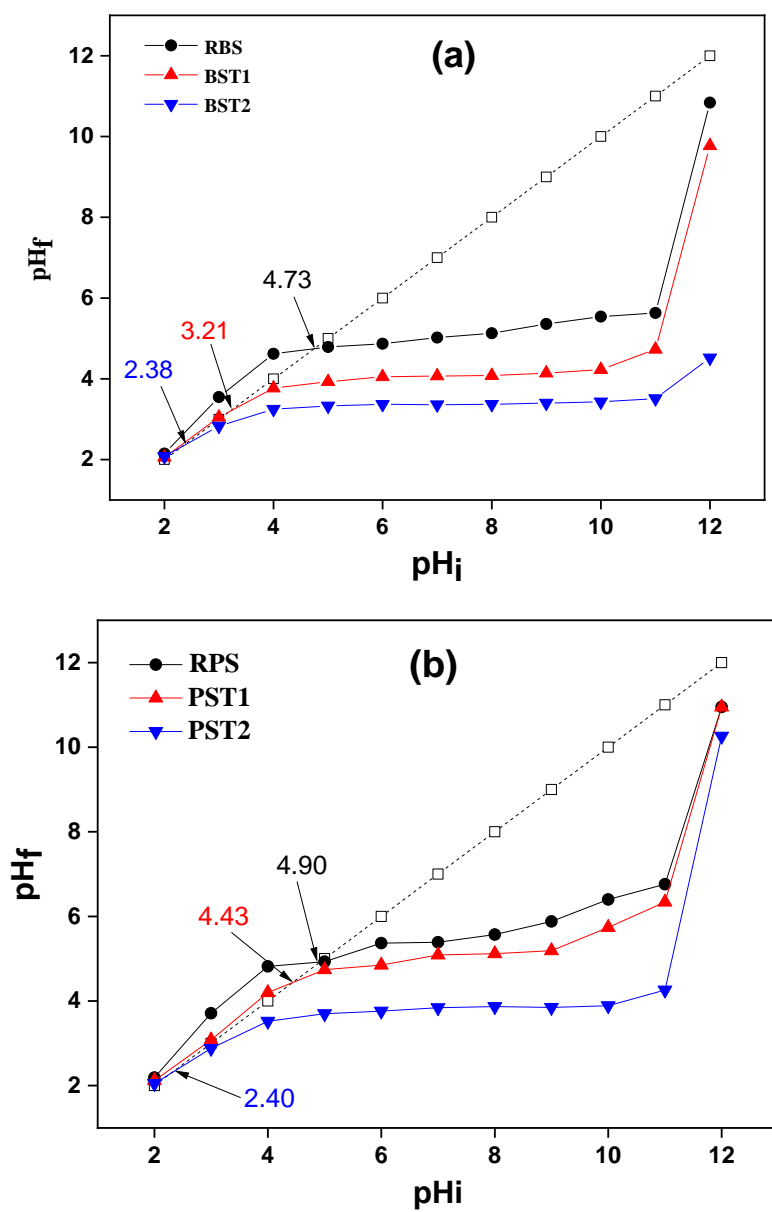

**Figure S1.** Point of zero charge graphs for bean pods **(a)** and pistachio pods **(b)**: RBS and RPS (black curve), BST1 and PST1 (red curve) and BST2 and PST2 (blue curve).

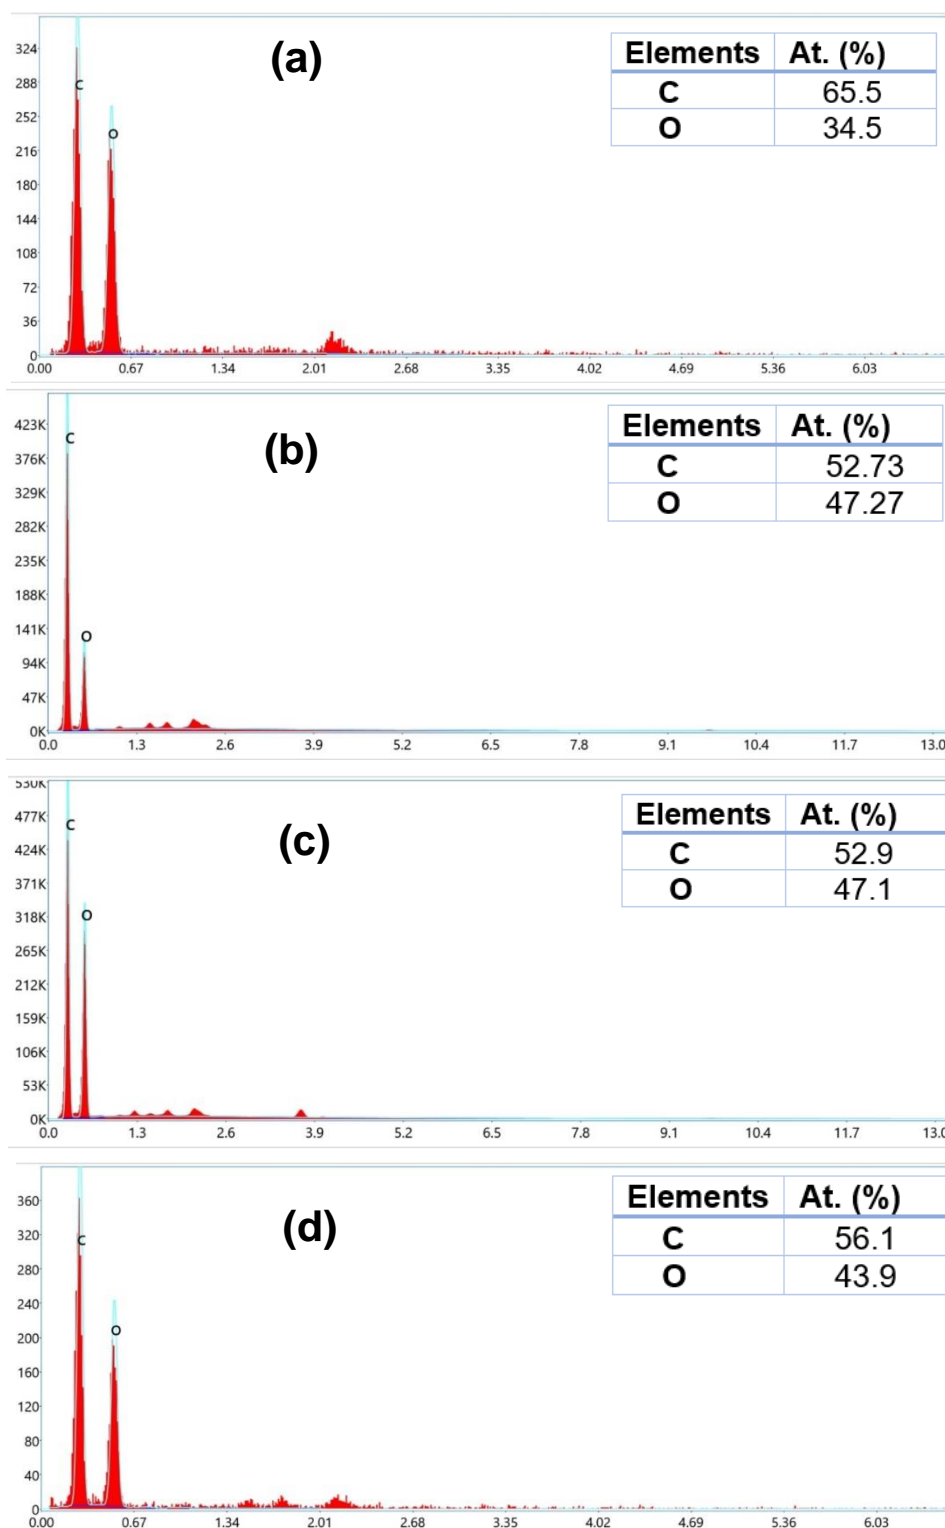

Figure S2. EDX spectra of RBS (a), BST2 (b), RPS (c) and PST2 (d).

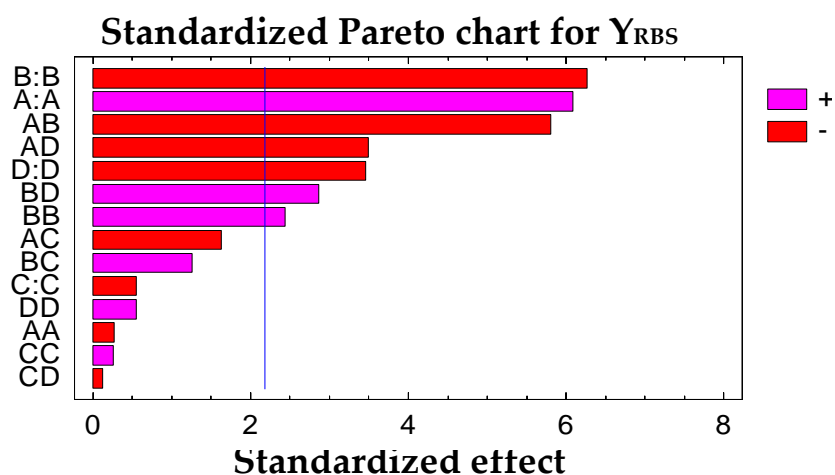

**Figure S3.** Pareto diagram for the amount of IC adsorbed by the RBS

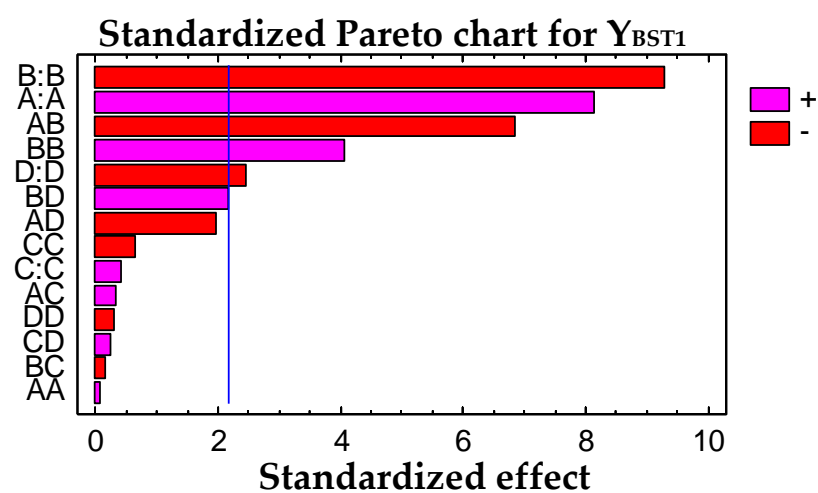

**Figure S4.** Pareto diagram for the amount of IC adsorbed by BST1

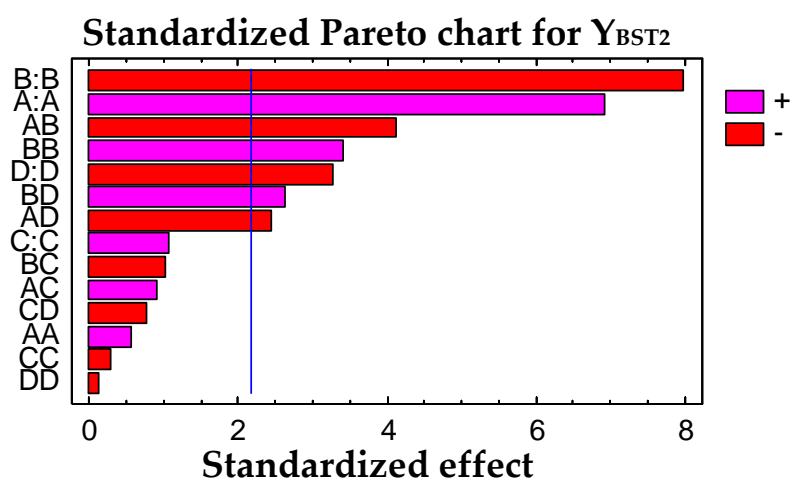

**Figure S5.** Pareto diagram for the amount of IC adsorbed by BST2.

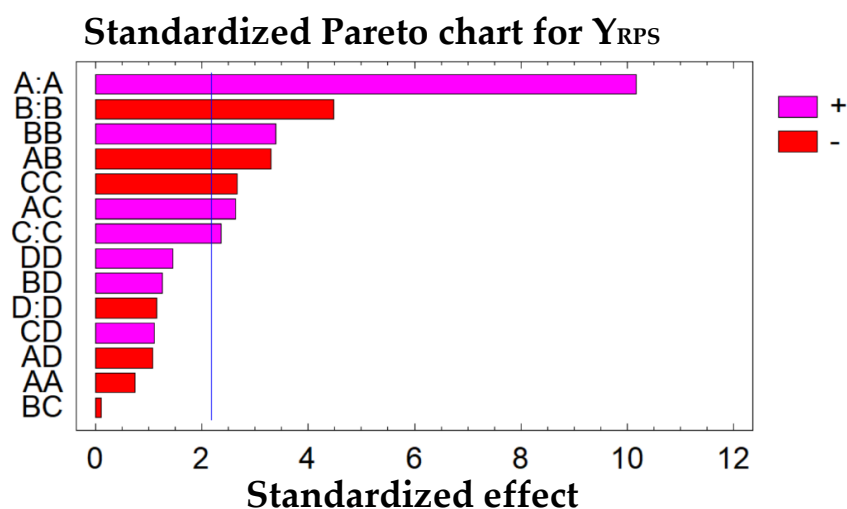

**Figure S6.** Pareto diagram for the amount of IC adsorbed by the RPS

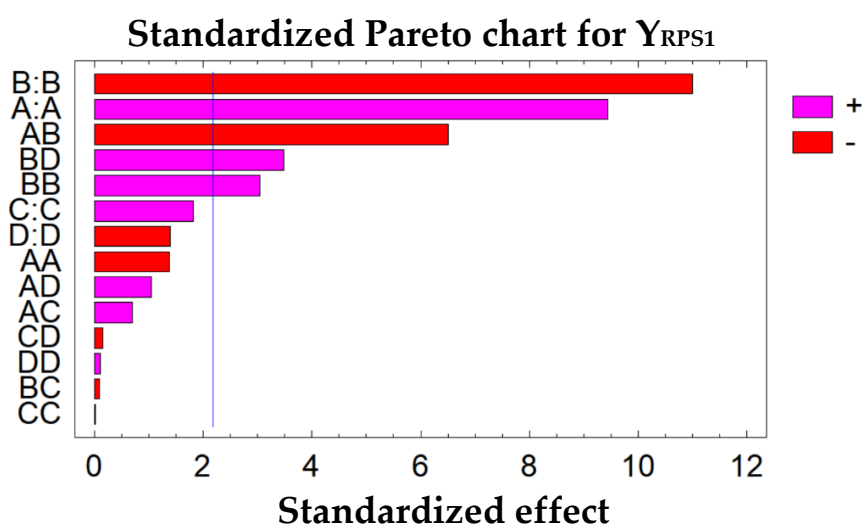

**Figure S7.** Pareto diagram for the amount of IC adsorbed by PST1.

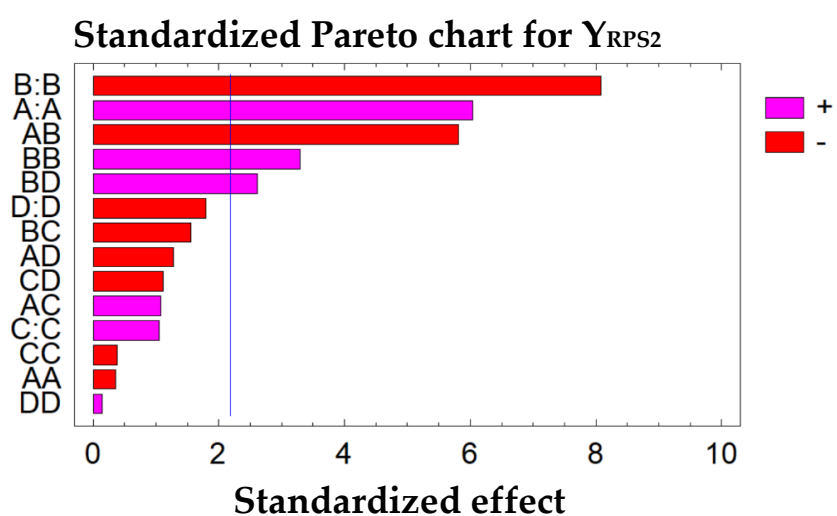

**Figure S8.** Pareto diagram for the amount of IC adsorbed by PST2.

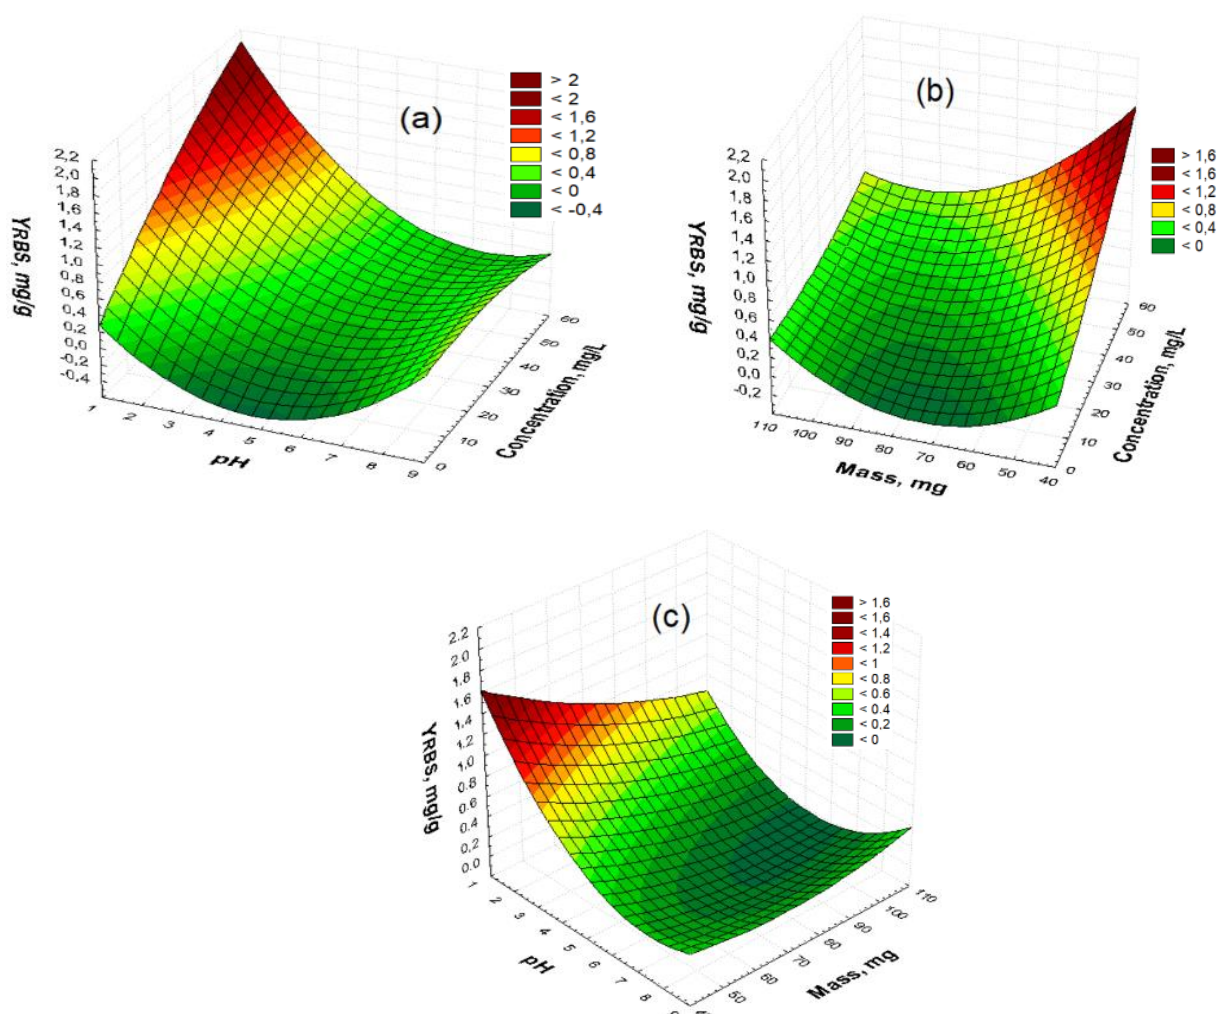

**Figure S9.** Surface responses for the amount of IC adsorbed by RBS as function of concentration and pH (a), concentration and mass (b), and of the effects of pH and the mass (c).

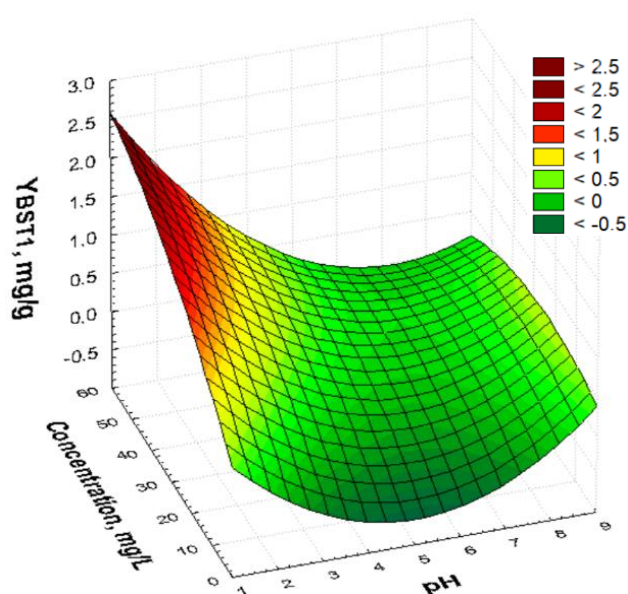

**Figure S10.** Surface response for the amount of IC adsorbed by BST1 as a function of concentration and pH effects.

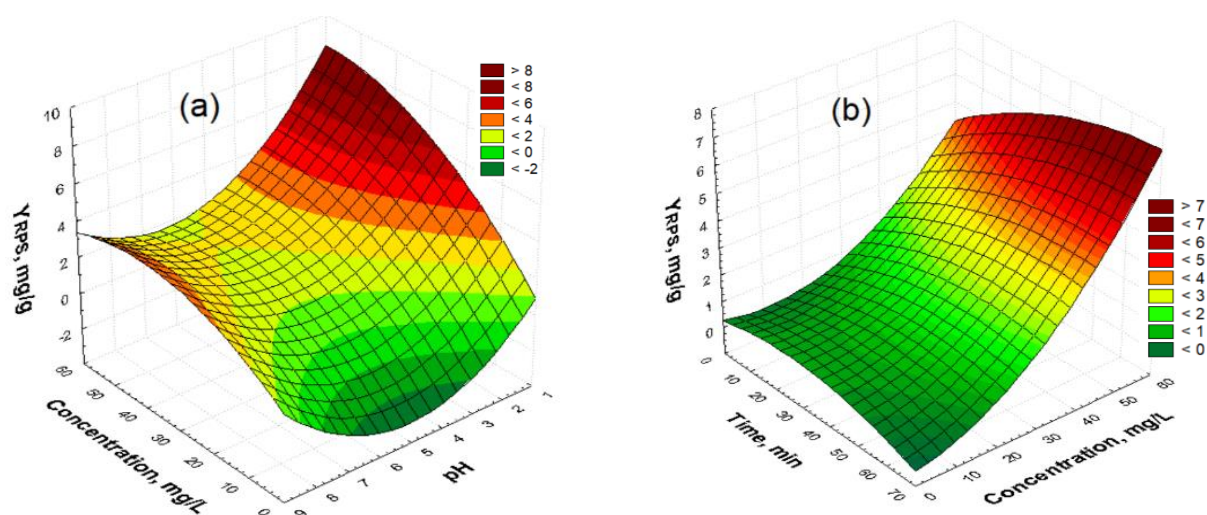

**Figure S11.** Surface responses for the amount of IC adsorbed by the RPS as a function of the effects of concentration and pH (a), of the effects of concentration and time (b).

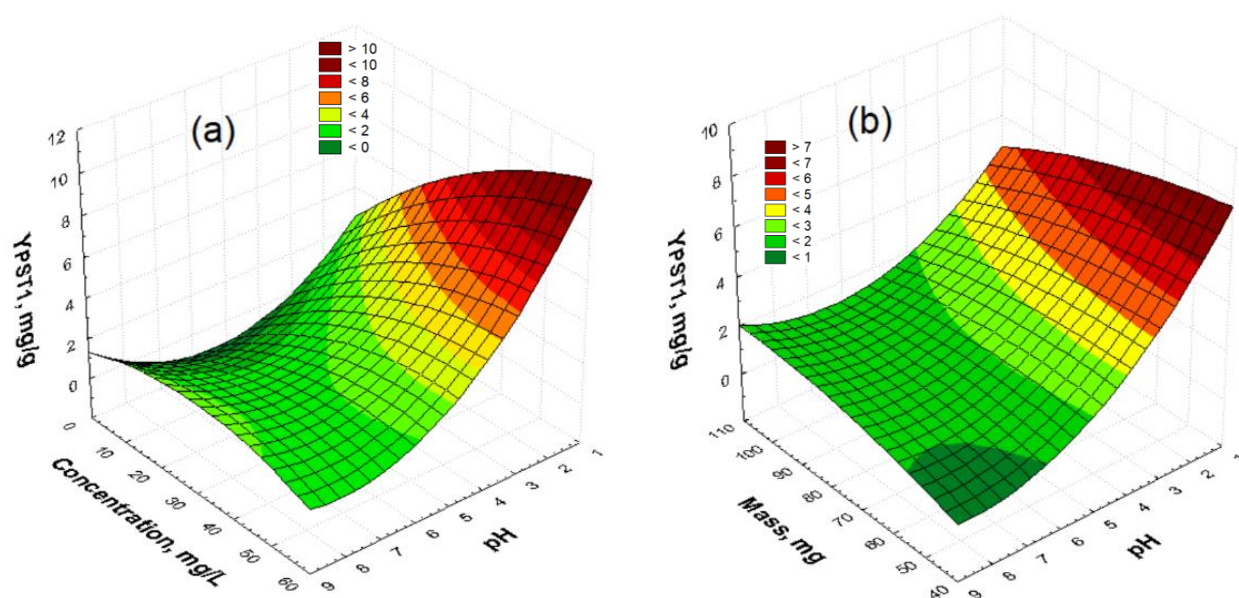

**Figure S12.** Surface responses for the amount of IC adsorbed by PST1 as a function of concentration and pH effects (a), pH effects and mass (b).

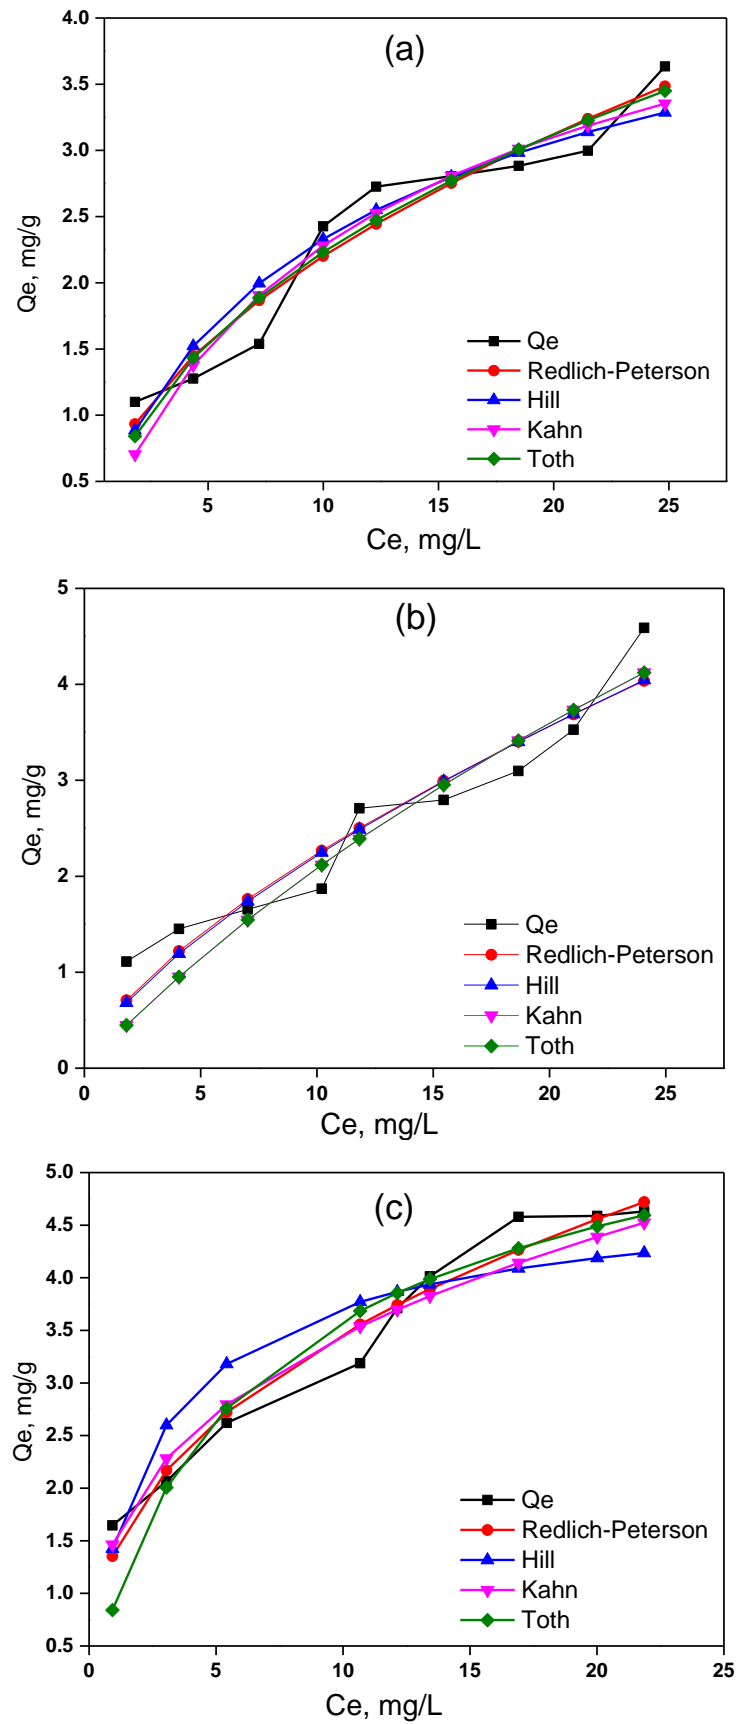

**Figure S13.** Adsorption isotherms of IC on (a) RBS, (b) BST1 and (c) BST2 materials.



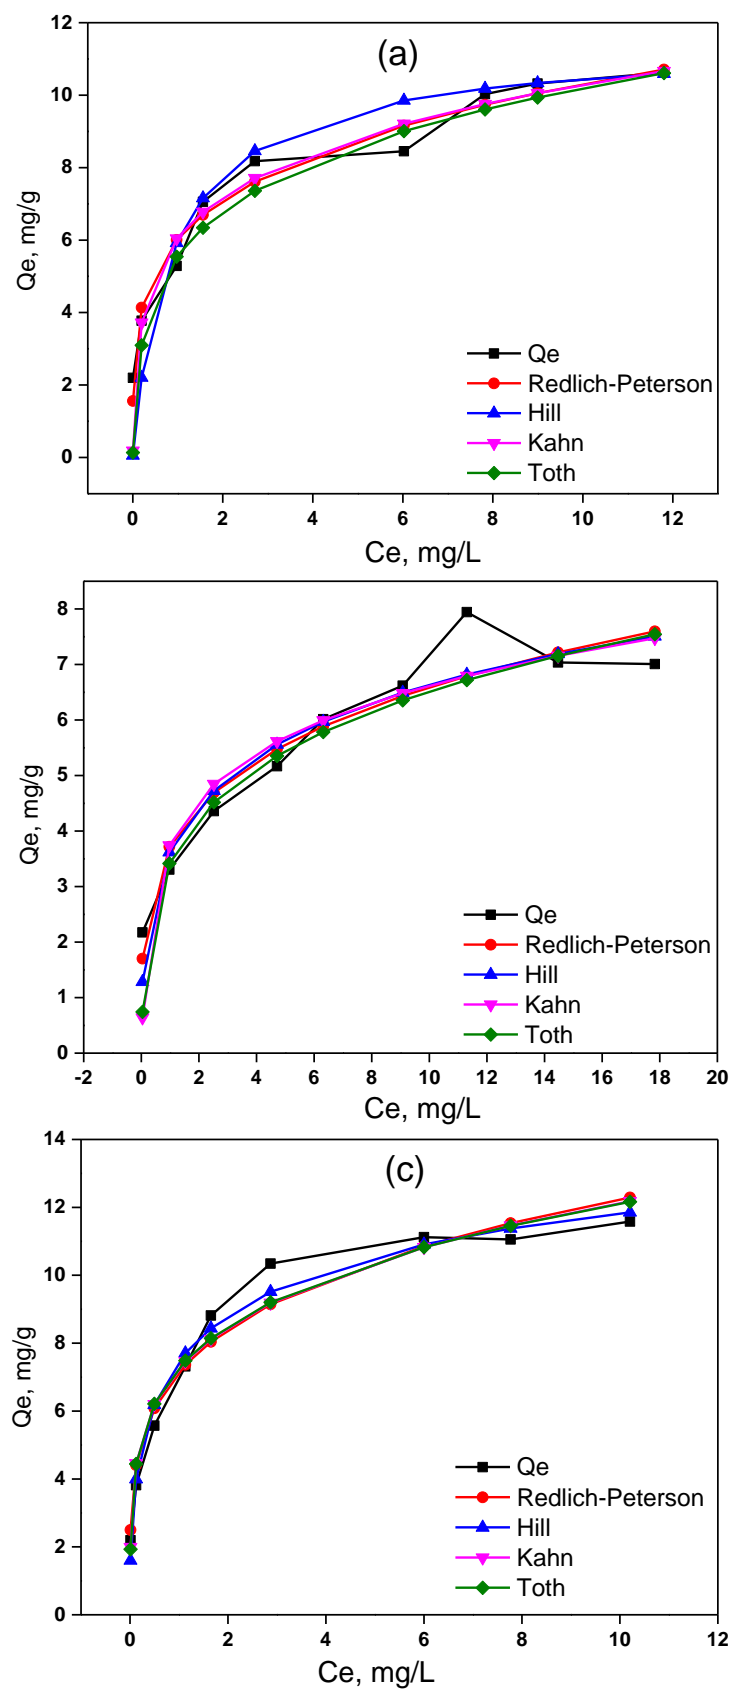

**Figure S14.** Adsorption isotherms of IC on (a) RPS, (b) PST1 and (c) PST2 materials.

**Table S1.** Error functions and their equations

| Error functions                  | Abbreviations | Formulas                                                                                                                                                       |
|----------------------------------|---------------|----------------------------------------------------------------------------------------------------------------------------------------------------------------|
| Residual Root Mean Square Error  | RMSE          | $\sqrt{\left(\frac{1}{n-1} \sum_{i=1}^n (q_{e,\text{exp}} - q_{e,\text{cal}})\right)^2}$                                                                       |
| Average Relative Error           | ARE           | $\frac{100}{n} \sum_{i=1}^n \left  \frac{q_{e,\text{exp}} - q_{e,\text{cal}}}{q_{e,\text{exp}}} \right _i$                                                     |
| Sun of absolute errors           | EABS          | $\sum_{i=1}^n  q_{e,\text{exp},i} - q_{e,\text{cal},i} $                                                                                                       |
| Hybrid fractional error function | HYBRID        | $\frac{100}{n-p} \sum_{i=1}^n \left[ \frac{(q_{e,\text{exp}} - q_{e,\text{cal}})^2}{q_{e,\text{exp}}} \right]$                                                 |
| Nonlinear chi-square test        | $\chi^2$      | $\sum_{i=1}^n \frac{(q_{e,\text{cal}} - q_{e,\text{exp}})^2}{q_{e,\text{exp}}}$                                                                                |
| Coefficient of determination     | $R^2$         | $\frac{(q_{e,\text{exp}} - \overline{q_{e,\text{cal}}})^2}{\sum (q_{e,\text{exp}} - \overline{q_{e,\text{cal}}})^2 + (q_{e,\text{exp}} - q_{e,\text{cal}})^2}$ |

**Table S2.** Main diffraction peaks observed in bean pods

| Samples | 2 $\theta$ | d      | Amorphous phase (%) | Diffraction peaks (%) |
|---------|------------|--------|---------------------|-----------------------|
| RBS     | 21.46      | 4.1406 | 93.24               | 6.76                  |
|         | 34.54      | 2.5968 |                     |                       |
| BST1    | 22.08      | 4.0252 | 90.83               | 9.17                  |
|         | 34.54      | 2.5999 |                     |                       |
| BST2    | 21.37      | 4.1576 | 92.92               | 7.08                  |
|         | 34.81      | 2.5775 |                     |                       |

**Table S3.** Main diffraction peaks observed in pistachio pods

| Samples | 2 $\theta$ | d      | Amorphous phase (%) | Diffraction peaks (%) |
|---------|------------|--------|---------------------|-----------------------|
| RPS     | 20.93      | 4.2450 | 92.37               | 7.63                  |
|         | 26.44      | 3.3706 |                     |                       |
|         | 42.46      | 2.1290 |                     |                       |
|         | 50.11      | 1.8204 |                     |                       |
|         | 54.92      | 1.6719 |                     |                       |
|         | 60.08      | 1.5401 |                     |                       |
|         | 68.17      | 1.3756 |                     |                       |
| PST1    | 21.55      | 4.1406 | 93.53               | 6.47                  |
|         | 26.62      | 3.3485 |                     |                       |
|         | 36.68      | 2.4503 |                     |                       |
|         | 50.11      | 1.8204 |                     |                       |
|         | 59.81      | 1.5463 |                     |                       |
|         | 67.82      | 1.3819 |                     |                       |
| PST2    | 20.93      | 4.2450 | 93.74               | 6.26                  |
|         | 26.44      | 3.3706 |                     |                       |
|         | 39.52      | 2.2801 |                     |                       |
|         | 40.41      | 2.2320 |                     |                       |
|         | 55.27      | 1.6620 |                     |                       |
|         | 68.09      | 1.3771 |                     |                       |

**Table S4.** Experimental design matrix for the removal of IC onto RBS, BST1 and BST2 materials using central composite design.

| Run | Factors |    |    |    | $Q_{ads}$ (mg/g) |      |      |      |      |       |      |      |      |
|-----|---------|----|----|----|------------------|------|------|------|------|-------|------|------|------|
|     |         |    |    |    | RBS              |      |      | BST1 |      |       | BST2 |      |      |
| No  | A       | B  | C  | D  | E.v.             | P.v. | R.   | E.v. | P.v. | R.    | E.v. | P.v. | R.   |
| 1   | +1      | -1 | +1 | +1 | 0.48             | 1.00 | 0.52 | 1.33 | 1.73 | 0.4   | 1.55 | 2.29 | 0.74 |
| 2   | +1      | -1 | +1 | -1 | 1.81             | 1.97 | 0.16 | 2.05 | 2.33 | 0.28  | 3.56 | 3.63 | 0.07 |
| 3   | 0       | 0  | -1 | 0  | 0.09             | 0.43 | 0.34 | 0.09 | 0.34 | 0.25  | 0.16 | 0.53 | 0.37 |
| 4   | 0       | 0  | 0  | 0  | 0.07             | 0.23 | 0.16 | 0.08 | 0.28 | 0.2   | 0.22 | 0.43 | 0.21 |
| 5   | -1      | +1 | +1 | +1 | 0.27             | 0.76 | 0.49 | 0.03 | 0.49 | 0.46  | 0.08 | 0.63 | 0.55 |
| 6   | -1      | -1 | -1 | -1 | 0.15             | 0.63 | 0.48 | 0.19 | 0.70 | 0.51  | 0.67 | 1.22 | 0.55 |
| 7   | 0       | +1 | 0  | 0  | 0.16             | 0.39 | 0.23 | 0.02 | 0.50 | 0.48  | 0.12 | 0.73 | 0.61 |
| 8   | -1      | 0  | 0  | 0  | 0.05             | 0.05 | 0.00 | 0.06 | 0.05 | -0.01 | 0.03 | 0.17 | 0.14 |
| 9   | +1      | +1 | -1 | +1 | 0.07             | 0.34 | 0.27 | 0.12 | 0.33 | 0.21  | 0.43 | 0.76 | 0.33 |
| 10  | -1      | -1 | -1 | +1 | 0.06             | 0.38 | 0.32 | 0.12 | 0.44 | 0.32  | 0.41 | 0.84 | 0.43 |
| 11  | +1      | +1 | +1 | -1 | 0.26             | 0.64 | 0.38 | 0.26 | 0.59 | 0.33  | 0.66 | 1.32 | 0.66 |
| 12  | +1      | -1 | -1 | -1 | 2.07             | 2.29 | 0.22 | 2.08 | 2.27 | 0.19  | 2.53 | 3.08 | 0.55 |
| 13  | -1      | +1 | -1 | -1 | 0.03             | 0.22 | 0.19 | 0.07 | 0.32 | 0.25  | 0.10 | 0.46 | 0.36 |
| 14  | 0       | -1 | 0  | 0  | 0.59             | 0.97 | 0.38 | 1.28 | 1.35 | 0.07  | 1.60 | 1.87 | 0.27 |
| 15  | 0       | 0  | 0  | +1 | 0.09             | 0.28 | 0.19 | 0.13 | 0.28 | 0.15  | 0.20 | 0.41 | 0.21 |
| 16  | -1      | +1 | +1 | -1 | 0.08             | 0.46 | 0.38 | 0.04 | 0.29 | 0.25  | 0.12 | 0.44 | 0.32 |
| 17  | -1      | -1 | +1 | +1 | 0.10             | 0.36 | 0.26 | 0.13 | 0.48 | 0.35  | 0.45 | 0.90 | 0.45 |
| 18  | +1      | +1 | +1 | +1 | 0.05             | 0.25 | 0.20 | 0.20 | 0.41 | 0.21  | 0.46 | 0.78 | 0.32 |
| 19  | 0       | 0  | 0  | 0  | 0.07             | 0.23 | 0.16 | 0.08 | 0.28 | 0.2   | 0.22 | 0.43 | 0.21 |
| 20  | 0       | 0  | 0  | -1 | 0.19             | 0.61 | 0.42 | 0.12 | 0.51 | 0.39  | 0.20 | 0.87 | 0.67 |
| 21  | -1      | +1 | -1 | +1 | 0.01             | 0.53 | 0.52 | 0.03 | 0.47 | 0.44  | 0.07 | 0.87 | 0.8  |
| 22  | -1      | -1 | +1 | -1 | 0.20             | 0.63 | 0.43 | 0.26 | 0.70 | 0.44  | 0.73 | 1.50 | 0.77 |
| 23  | 0       | 0  | 0  | 0  | 0.073            | 0.23 | 0.16 | 0.08 | 0.28 | 0.2   | 0.22 | 0.43 | 0.21 |
| 24  | 0       | 0  | +1 | 0  | 0.12             | 0.38 | 0.26 | 0.08 | 0.37 | 0.29  | 0.18 | 0.68 | 0.5  |
| 25  | +1      | -1 | -1 | +1 | 1.05             | 1.35 | 0.3  | 1.16 | 1.63 | 0.47  | 1.42 | 1.97 | 0.55 |
| 26  | +1      | 0  | 0  | 0  | 0.01             | 0.62 | 0.61 | 0.25 | 0.80 | 0.55  | 0.43 | 1.17 | 0.74 |
| 27  | +1      | +1 | -1 | -1 | 0.30             | 0.72 | 0.42 | 0.19 | 0.56 | 0.37  | 0.66 | 1.08 | 0.42 |

E.v.: Experimental values, P.v.: Predicted values, R: Residuals

**Table S5.** Experimental design matrix for the removal of IC onto RPS, PST1 and PST2 materials using central composite design.

| Run | Factors |    |    |    | Q <sub>ads</sub> (mg/g) |      |       |      |       |      |       |       |      |
|-----|---------|----|----|----|-------------------------|------|-------|------|-------|------|-------|-------|------|
|     |         |    |    |    | RPS                     |      |       | PST1 |       |      | PST2  |       |      |
| No  | A       | B  | C  | D  | E.v.                    | P.v. | R.    | E.v. | P.v.  | R.   | E.v.  | P.v.  | R.   |
| 1   | +1      | -1 | +1 | +1 | 6.15                    | 7.32 | 1.17  | 7.43 | 8.69  | 1.26 | 7.93  | 10.91 | 2.98 |
| 2   | +1      | -1 | +1 | -1 | 7.42                    | 8.98 | 1.56  | 8.95 | 10.12 | 1.17 | 15.35 | 15.49 | 0.14 |
| 3   | 0       | 0  | -1 | 0  | 0.01                    | 0.84 | 0.83  | 1.22 | 3.00  | 1.78 | 0.30  | 2.18  | 1.88 |
| 4   | 0       | 0  | 0  | 0  | 1.20                    | 2.13 | 0.93  | 2.60 | 2.78  | 0.18 | 0.60  | 1.83  | 1.23 |
| 5   | -1      | +1 | +1 | +1 | 0.01                    | 1.44 | 1.43  | 0.01 | 2.29  | 2.28 | 0.16  | 2.68  | 2.52 |
| 6   | -1      | -1 | -1 | -1 | 0.06                    | 1.95 | 1.89  | 2.68 | 4.19  | 1.51 | 2.12  | 4.26  | 2.14 |
| 7   | 0       | +1 | 0  | 0  | 1.43                    | 3.56 | 2.13  | 1.56 | 2.81  | 1.25 | 2.06  | 3.05  | 0.99 |
| 8   | -1      | 0  | 0  | 0  | 0.03                    | 0.31 | 0.28  | 0.44 | 1.08  | 0.64 | 0.16  | 0.60  | 0.44 |
| 9   | +1      | +1 | -1 | +1 | 1.57                    | 2.25 | 0.68  | 2.26 | 3.01  | 0.75 | 1.50  | 2.88  | 1.38 |
| 10  | -1      | -1 | -1 | +1 | 0.40                    | 1.74 | 1.34  | 1.18 | 2.12  | 0.94 | 1.08  | 2.95  | 1.87 |
| 11  | +1      | +1 | +1 | -1 | 3.27                    | 4.31 | 1.04  | 1.00 | 2.69  | 1.69 | 0.09  | 3.47  | 3.38 |
| 12  | +1      | -1 | -1 | -1 | 6.19                    | 7.01 | 0.82  | 8.80 | 9.14  | 0.34 | 9.53  | 12.25 | 2.72 |
| 13  | -1      | +1 | -1 | -1 | 0.38                    | 1.46 | 1.08  | 0.19 | 1.55  | 1.36 | 0.04  | 2.31  | 2.27 |
| 14  | 0       | -1 | 0  | 0  | 5.33                    | 5.31 | -0.02 | 5.39 | 6.58  | 1.19 | 5.14  | 8.25  | 3.11 |
| 15  | 0       | 0  | 0  | +1 | 1.74                    | 3.04 | 1.3   | 2.33 | 3.13  | 0.8  | 0.93  | 2.39  | 1.46 |
| 16  | -1      | +1 | +1 | -1 | 0.01                    | 1.16 | 1.15  | 1.52 | 1.94  | 0.42 | 0.01  | 1.94  | 1.93 |
| 17  | -1      | -1 | +1 | +1 | 0.41                    | 1.71 | 1.3   | 1.39 | 2.46  | 1.07 | 1.10  | 3.19  | 2.09 |
| 18  | +1      | +1 | +1 | +1 | 4.75                    | 5.66 | 0.91  | 2.85 | 3.86  | 1.01 | 0.16  | 2.46  | 2.3  |
| 19  | 0       | 0  | 0  | 0  | 0.92                    | 2.13 | 1.21  | 2.07 | 2.78  | 0.71 | 0.57  | 1.83  | 1.26 |
| 20  | 0       | 0  | 0  | -1 | 3.02                    | 3.82 | 0.8   | 1.97 | 3.61  | 1.64 | 0.91  | 3.55  | 2.64 |
| 21  | -1      | +1 | -1 | +1 | 0.20                    | 1.56 | 1.36  | 0.72 | 2.02  | 1.3  | 0.26  | 4.57  | 4.31 |
| 22  | -1      | -1 | +1 | -1 | 0.17                    | 1.74 | 1.57  | 2.77 | 4.65  | 1.88 | 2.16  | 6.03  | 3.87 |
| 23  | 0       | 0  | 0  | 0  | 2.08                    | 2.13 | 0.05  | 2.47 | 2.78  | 0.31 | 0.61  | 1.83  | 1.22 |
| 24  | 0       | 0  | +1 | 0  | 0.48                    | 1.76 | 1.28  | 2.95 | 3.62  | 0.67 | 0.64  | 2.86  | 2.22 |
| 25  | +1      | -1 | -1 | +1 | 3.39                    | 5.17 | 1.78  | 5.79 | 7.83  | 2.04 | 6.68  | 9.19  | 2.51 |
| 26  | +1      | 0  | 0  | 0  | 2.45                    | 4.27 | 1.82  | 2.51 | 4.31  | 1.8  | 0.82  | 4.48  | 3.66 |
| 27  | +1      | +1 | -1 | -1 | 2.17                    | 3.80 | 1.63  | 0.40 | 1.79  | 1.39 | 0.01  | 2.36  | 2.35 |

E.v.: Experimental values, P.v.: Predicted values, R: Residuals

**Table S6.** Analysis of variance of the amount of IC adsorbed by RBS material

| Source                                                         | Df | SS         | MS         | F-ratio | P-value |
|----------------------------------------------------------------|----|------------|------------|---------|---------|
| A                                                              | 1  | 1.47347    | 1.47347    | 38.43   | 0.0000* |
| B                                                              | 1  | 1.5488     | 1.5488     | 40.39   | 0.0000* |
| C                                                              | 1  | 0.0117556  | 0.0117556  | 0.31    | 0.5900  |
| D                                                              | 1  | 0.47045    | 0.47045    | 12.27   | 0.0044* |
| A <sup>2</sup>                                                 | 1  | 0.00433038 | 0.00433038 | 0.11    | 0.7426  |
| AB                                                             | 1  | 1.32826    | 1.32826    | 34.64   | 0.0001* |
| AC                                                             | 1  | 0.104006   | 0.104006   | 2.71    | 0.1255  |
| AD                                                             | 1  | 0.479556   | 0.479556   | 12.51   | 0.0041* |
| B <sup>2</sup>                                                 | 1  | 0.237583   | 0.237583   | 6.20    | 0.0285* |
| BC                                                             | 1  | 0.0612562  | 0.0612562  | 1.60    | 0.2303  |
| BD                                                             | 1  | 0.322056   | 0.322056   | 8.40    | 0.0134* |
| C <sup>2</sup>                                                 | 1  | 0.0029661  | 0.0029661  | 0.08    | 0.7857  |
| CD                                                             | 1  | 0.00050625 | 0.00050625 | 0.01    | 0.9104  |
| D <sup>2</sup>                                                 | 1  | 0.0122294  | 0.0122294  | 0.32    | 0.5827  |
| R <sup>2</sup> = 93.4225 % Adjusted R <sup>2</sup> = 85.7488 % |    |            |            |         |         |

\*Significant; Df = degree of freedom; SS = sum of squares MS = mean square; adjR<sup>2</sup>=adjusted R<sup>2</sup>

**Table S7.** Analysis of variance of the amount of IC adsorbed BST1 material

| Source                                                         | Df | SS            | MS            | F-ratio | P-value |
|----------------------------------------------------------------|----|---------------|---------------|---------|---------|
| A                                                              | 1  | 2.50134       | 2.50134       | 68.31   | 0.0000* |
| B                                                              | 1  | 3.24276       | 3.24276       | 88.56   | 0.0000* |
| C                                                              | 1  | 0.00605       | 0.00605       | 0.17    | 0.6915  |
| D                                                              | 1  | 0.22445       | 0.22445       | 6.13    | 0.0292* |
| A <sup>2</sup>                                                 | 1  | 0.00000714286 | 0.00000714286 | 0.00    | 0.9891  |
| AB                                                             | 1  | 1.7689        | 1.7689        | 48.31   | 0.0000* |
| AC                                                             | 1  | 0.0036        | 0.0036        | 0.10    | 0.7592  |
| AD                                                             | 1  | 0.1444        | 0.1444        | 3.94    | 0.0704  |
| B <sup>2</sup>                                                 | 1  | 0.625829      | 0.625829      | 17.09   | 0.0014* |
| BC                                                             | 1  | 0.000625      | 0.000625      | 0.02    | 0.8982  |
| BD                                                             | 1  | 0.172225      | 0.172225      | 4.70    | 0.0509  |
| C <sup>2</sup>                                                 | 1  | 0.0132071     | 0.0132071     | 0.36    | 0.5593  |
| CD                                                             | 1  | 0.002025      | 0.002025      | 0.06    | 0.8180  |
| D <sup>2</sup>                                                 | 1  | 0.00257857    | 0.00257857    | 0.07    | 0.7952  |
| R <sup>2</sup> = 95.4269 % Adjusted R <sup>2</sup> = 90.0917 % |    |               |               |         |         |

\*Significant; Df = degree of freedom; SS = sum of squares MS = mean square; adjR<sup>2</sup>=adjusted R<sup>2</sup>

**Table S8.** Analysis of variance of the amount of IC adsorbed by BST2 material

| Source                                                         | Df | SS         | MS         | F-ratio | P-value |
|----------------------------------------------------------------|----|------------|------------|---------|---------|
| A                                                              | 1  | 4.54009    | 4.54009    | 58.38   | 0.0000* |
| B                                                              | 1  | 5.80269    | 5.80269    | 74.62   | 0.0000* |
| C                                                              | 1  | 0.0997556  | 0.0997556  | 1.28    | 0.2795  |
| D                                                              | 1  | 0.961422   | 0.961422   | 12.36   | 0.0043* |
| A <sup>2</sup>                                                 | 1  | 0.00237178 | 0.00237178 | 0.03    | 0.8643  |
| AB                                                             | 1  | 1.5376     | 1.5376     | 19.77   | 0.0008* |
| AC                                                             | 1  | 0.070225   | 0.070225   | 0.90    | 0.3607  |
| AD                                                             | 1  | 0.540225   | 0.540225   | 6.95    | 0.0217* |
| B <sup>2</sup>                                                 | 1  | 1.12137    | 1.12137    | 14.42   | 0.0025* |
| BC                                                             | 1  | 0.09       | 0.09       | 1.16    | 0.3032  |
| BD                                                             | 1  | 0.6241     | 0.6241     | 8.03    | 0.0151* |
| C <sup>2</sup>                                                 | 1  | 0.0022575  | 0.0022575  | 0.03    | 0.8675  |
| CD                                                             | 1  | 0.050625   | 0.050625   | 0.65    | 0.4355  |
| D <sup>2</sup>                                                 | 1  | 3.52734E-7 | 3.52734E-7 | 0.00    | 0.9983  |
| R <sup>2</sup> = 94.7797 % Adjusted R <sup>2</sup> = 88.6893 % |    |            |            |         |         |

\*Significant; Df = degree of freedom; SS = sum of squares MS = mean square; adjR<sup>2</sup>=adjusted R<sup>2</sup>

**Table S9.** Analysis of variance of the amount of IC adsorbed by RPS material

| Source                                                        | Df | SS         | MS         | F-ratio | P-value |
|---------------------------------------------------------------|----|------------|------------|---------|---------|
| A                                                             | 1  | 70.7653    | 70.7653    | 103.31  | 0.0000* |
| B                                                             | 1  | 13.7463    | 13.7463    | 20.07   | 0.0008* |
| C                                                             | 1  | 3.82722    | 3.82722    | 5.59    | 0.0358* |
| D                                                             | 1  | 0.920272   | 0.920272   | 1.34    | 0.2690  |
| A <sup>2</sup>                                                | 1  | 0.381884   | 0.381884   | 0.56    | 0.4696  |
| AB                                                            | 1  | 7.49391    | 7.49391    | 10.94   | 0.0063* |
| AC                                                            | 1  | 4.74151    | 4.74151    | 6.92    | 0.0219* |
| AD                                                            | 1  | 0.805506   | 0.805506   | 1.18    | 0.2995  |
| B <sup>2</sup>                                                | 1  | 7.91672    | 7.91672    | 11.56   | 0.0053* |
| BC                                                            | 1  | 0.00950625 | 0.00950625 | 0.01    | 0.9082  |
| BD                                                            | 1  | 1.09726    | 1.09726    | 1.60    | 0.2297  |
| C <sup>2</sup>                                                | 1  | 4.89966    | 4.89966    | 7.15    | 0.0202* |
| CD                                                            | 1  | 0.851006   | 0.851006   | 1.24    | 0.2868  |
| D <sup>2</sup>                                                | 1  | 1.46434    | 1.46434    | 2.14    | 0.1694  |
| R <sup>2</sup> = 93.4812 % Adjusted R <sup>2</sup> = 85.876 % |    |            |            |         |         |

\*Significant; Df = degree of freedom; SS = sum of squares MS = mean square; adjR<sup>2</sup>=adjusted R<sup>2</sup>

**Table S10.** Analysis of variance of the amount of IC adsorbed by PST1 material

| Source                                                         | Df | SS          | MS          | F-ratio | P-value |
|----------------------------------------------------------------|----|-------------|-------------|---------|---------|
| A                                                              | 1  | 47.0127     | 47.0127     | 89.14   | 0.0000* |
| B                                                              | 1  | 63.732      | 63.732      | 120.84  | 0.0000* |
| C                                                              | 1  | 1.76094     | 1.76094     | 3.34    | 0.0926  |
| D                                                              | 1  | 1.0368      | 1.0368      | 1.97    | 0.1862  |
| A <sup>2</sup>                                                 | 1  | 0.998521    | 0.998521    | 1.89    | 0.1940  |
| AB                                                             | 1  | 22.2784     | 22.2784     | 42.24   | 0.0000* |
| AC                                                             | 1  | 0.265225    | 0.265225    | 0.50    | 0.4918  |
| AD                                                             | 1  | 0.5776      | 0.5776      | 1.10    | 0.3159  |
| B <sup>2</sup>                                                 | 1  | 4.87471     | 4.87471     | 9.24    | 0.0103* |
| BC                                                             | 1  | 0.0049      | 0.0049      | 0.01    | 0.9248  |
| BD                                                             | 1  | 6.42622     | 6.42622     | 12.18   | 0.0045* |
| C <sup>2</sup>                                                 | 1  | 0.000444533 | 0.000444533 | 0.00    | 0.9773  |
| CD                                                             | 1  | 0.0121      | 0.0121      | 0.02    | 0.8821  |
| D <sup>2</sup>                                                 | 1  | 0.00691358  | 0.00691358  | 0.01    | 0.9107  |
| R <sup>2</sup> = 95.9566 % Adjusted R <sup>2</sup> = 91.2393 % |    |             |             |         |         |

\*Significant; Df = degree of freedom; SS = sum of squares MS = mean square; adjR<sup>2</sup>=adjusted R<sup>2</sup>

**Table S11.** Analysis of variance of the amount of IC adsorbed by PST2 material

| Source                                                           | Df | SS        | MS        | F-ratio | P-value |
|------------------------------------------------------------------|----|-----------|-----------|---------|---------|
| A                                                                | 1  | 67.9778   | 67.9778   | 36.49   | 0.0001* |
| B                                                                | 1  | 121.68    | 121.68    | 65.31   | 0.0000* |
| C                                                                | 1  | 2.05369   | 2.05369   | 1.10    | 0.3144  |
| D                                                                | 1  | 6.03202   | 6.03202   | 3.24    | 0.0971  |
| A <sup>2</sup>                                                   | 1  | 0.242998  | 0.242998  | 0.13    | 0.7243  |
| AB                                                               | 1  | 62.9642   | 62.9642   | 33.80   | 0.0001* |
| AC                                                               | 1  | 2.1609    | 2.1609    | 1.16    | 0.3027  |
| AD                                                               | 1  | 3.04502   | 3.04502   | 1.63    | 0.2253  |
| B <sup>2</sup>                                                   | 1  | 20.1974   | 20.1974   | 10.84   | 0.0064* |
| BC                                                               | 1  | 4.5369    | 4.5369    | 2.44    | 0.1446  |
| BD                                                               | 1  | 12.7806   | 12.7806   | 6.86    | 0.0224* |
| C <sup>2</sup>                                                   | 1  | 0.275646  | 0.275646  | 0.15    | 0.7072  |
| CD                                                               | 1  | 2.3104    | 2.3104    | 1.24    | 0.2872  |
| D <sup>2</sup>                                                   | 1  | 0.0386459 | 0.0386459 | 0.02    | 0.8879  |
| R <sup>2</sup> = 93. 5205 % Adjusted R <sup>2</sup> = 85. 9611 % |    |           |           |         |         |

\*Significant; Df = degree of freedom; SS = sum of squares MS = mean square; adjR<sup>2</sup>=adjusted R<sup>2</sup>



**Table S12.** Data from the Redlich-Peterson, Hill, Kaln and Toth isotherms for the sorption of IC by RBS, BST1 and BST2 materials.

| Models           | Constants               | Value    | R <sup>2</sup> | $\chi^2$ | Errors |        |       |       |
|------------------|-------------------------|----------|----------------|----------|--------|--------|-------|-------|
|                  |                         |          |                |          | REQM   | HYBRID | ERM   | SEA   |
| IC/RBS           |                         |          |                |          |        |        |       |       |
| Hill             | Q <sub>m</sub> (mg/g)   | 5.315    | 0.991          | 0.023    | 0.290  | 0.395  | 0.069 | 0.104 |
|                  | K <sub>H</sub> (L/g)    | 8.123    |                |          |        |        |       |       |
|                  | n <sub>H</sub>          | 0.802    |                |          |        |        |       |       |
| Kahn             | Q <sub>max</sub> (mg/g) | 3.821    | 0.991          | 0.023    | 0.287  | 0.385  | 0.154 | 0.231 |
|                  | b <sub>K</sub> (L/g)    | 0.120    |                |          |        |        |       |       |
|                  | a <sub>K</sub>          | 0.885    |                |          |        |        |       |       |
| Redlich-Peterson | A(L/g)                  | 549.67   | 0.993          | 0.018    | 0.256  | 0.306  | 0.009 | 0.014 |
|                  | B(L/mg)                 | 797.91   |                |          |        |        |       |       |
|                  | β                       | 0.495    |                |          |        |        |       |       |
| Toth             | Q(mg/g)                 | 1.016    | 0.992          | 0.019    | 0.264  | 0.326  | 0.042 | 0.063 |
|                  | K <sub>e</sub>          | 1.196    |                |          |        |        |       |       |
|                  | N                       | 0.772    |                |          |        |        |       |       |
| IC/BST1          |                         |          |                |          |        |        |       |       |
| Hill             | Q <sub>m</sub> (mg/g)   | 222.073  | 0.987          | 0.039    | 0.387  | 0.657  | 0.205 | 0.328 |
|                  | K <sub>H</sub> (L/g)    | 490.316  |                |          |        |        |       |       |
|                  | n <sub>H</sub>          | 0.694    |                |          |        |        |       |       |
| Kahn             | Q <sub>max</sub> (mg/g) | 4.296    | 0.981          | 0.054    | 0.456  | 0.913  | 0.706 | 1.127 |
|                  | b <sub>K</sub> (L/g)    | 0.060    |                |          |        |        |       |       |
|                  | a <sub>K</sub>          | 0.461    |                |          |        |        |       |       |
| Redlich-Peterson | A(L/g)                  | 39856.8  | 0.987          | 0.038    | 0.384  | 0.648  | 0.141 | 0.226 |
|                  | B(L/mg)                 | 84062.51 |                |          |        |        |       |       |
|                  | β                       | 0.327    |                |          |        |        |       |       |
| Toth             | Q(mg/g)                 | 0.992    | 0.984          | 0.046    | 0.420  | 0.773  | 0.274 | 0.438 |
|                  | K <sub>e</sub>          | 3.557    |                |          |        |        |       |       |
|                  | N                       | 0.698    |                |          |        |        |       |       |
| IC/BST2          |                         |          |                |          |        |        |       |       |
| Hill             | Q <sub>m</sub> (mg/g)   | 4.985    | 0.986          | 0.050    | 0.512  | 0.845  | 0.114 | 0.248 |
|                  | K <sub>H</sub> (L/g)    | 2.329    |                |          |        |        |       |       |
|                  | n <sub>H</sub>          | 0.836    |                |          |        |        |       |       |
| Kahn             | Q <sub>max</sub> (mg/g) | 0.664    | 0.995          | 0.016    | 0.291  | 0.273  | 0.179 | 0.389 |
|                  | b <sub>K</sub> (L/g)    | 12.959   |                |          |        |        |       |       |
|                  | a <sub>K</sub>          | 0.660    |                |          |        |        |       |       |
| Redlich-Peterson | A(L/g)                  | 66023.6  | 0.996          | 0.011    | 0.247  | 0.196  | 0.029 | 0.064 |
|                  | B(L/mg)                 | 47225.6  |                |          |        |        |       |       |
|                  | β                       | 0.606    |                |          |        |        |       |       |
| Toth             | Q(mg/g)                 | 3.913    | 0.991          | 0.033    | 0.415  | 0.557  | 0.250 | 0.543 |
|                  | K <sub>e</sub>          | 3.739    |                |          |        |        |       |       |
|                  | N                       | 0.944    |                |          |        |        |       |       |

**Table S13.** Data from the Redlich-Peterson, Hill, Kaln and Toth isotherms for the sorption of IC by RPS, PST1 and PST2 materials.

| Models           | Constants               | Value   | R <sup>2</sup> | $\chi^2$ | Errors |        |       |       |
|------------------|-------------------------|---------|----------------|----------|--------|--------|-------|-------|
|                  |                         |         |                |          | REQM   | HYBRID | ERM   | SEA   |
| IC/RPS           |                         |         |                |          |        |        |       |       |
| Hill             | Q <sub>m</sub> (mg/g)   | 11.589  | 0.984          | 0.144    | 1.260  | 2.410  | 0.250 | 1.157 |
|                  | K <sub>H</sub> (L/g)    | 0.935   |                |          |        |        |       |       |
|                  | n <sub>H</sub>          | 0.929   |                |          |        |        |       |       |
| Kahn             | Q <sub>max</sub> (mg/g) | 3.369   | 0.990          | 0.085    | 0.969  | 1.427  | 0.389 | 1.795 |
|                  | b <sub>K</sub> (L/g)    | 19.308  |                |          |        |        |       |       |
|                  | a <sub>K</sub>          | 0.787   |                |          |        |        |       |       |
| Redlich-Peterson | A(L/g)                  | 86331.8 | 0.996          | 0.032    | 0.602  | 0.549  | 0.052 | 0.243 |
|                  | B(L/mg)                 | 14292.8 |                |          |        |        |       |       |
|                  | β                       | 0.768   |                |          |        |        |       |       |
| Toth             | Q(mg/g)                 | 6.039   | 0.988          | 0.100    | 1.048  | 1.666  | 0.928 | 4.283 |
|                  | K <sub>e</sub>          | 0.094   |                |          |        |        |       |       |
|                  | N                       | 0.876   |                |          |        |        |       |       |
| IC/PST1          |                         |         |                |          |        |        |       |       |
| Hill             | Q <sub>m</sub> (mg/g)   | 15.992  | 0.991          | 0.054    | 0.674  | 0.915  | 0.131 | 0.458 |
|                  | K <sub>H</sub> (L/g)    | 3.388   |                |          |        |        |       |       |
|                  | n <sub>H</sub>          | 0.381   |                |          |        |        |       |       |
| Kahn             | Q <sub>max</sub> (mg/g) | 2.901   | 0.985          | 0.091    | 0.870  | 1.527  | 0.255 | 0.886 |
|                  | b <sub>K</sub> (L/g)    | 6.499   |                |          |        |        |       |       |
|                  | a <sub>K</sub>          | 0.799   |                |          |        |        |       |       |
| Redlich-Peterson | A(L/g)                  | 67664.3 | 0.992          | 0.047    | 0.626  | 0.790  | 0.032 | 0.112 |
|                  | B(L/mg)                 | 18096.3 |                |          |        |        |       |       |
|                  | β                       | 0.754   |                |          |        |        |       |       |
| Toth             | Q(mg/g)                 | 3.739   | 0.986          | 0.081    | 0.820  | 1.357  | 0.586 | 2.037 |
|                  | K <sub>e</sub>          | 0.100   |                |          |        |        |       |       |
|                  | N                       | 0.868   |                |          |        |        |       |       |
| IC/PST2          |                         |         |                |          |        |        |       |       |
| Hill             | Q <sub>m</sub> (mg/g)   | 17.589  | 0.994          | 0.049    | 0.767  | 0.821  | 0.080 | 0.405 |
|                  | K <sub>H</sub> (L/g)    | 1.354   |                |          |        |        |       |       |
|                  | n <sub>H</sub>          | 0.443   |                |          |        |        |       |       |
| Kahn             | Q <sub>max</sub> (mg/g) | 2.274   | 0.995          | 0.045    | 0.740  | 0.763  | 0.016 | 0.083 |
|                  | b <sub>K</sub> (L/g)    | 194.024 |                |          |        |        |       |       |
|                  | a <sub>K</sub>          | 0.779   |                |          |        |        |       |       |
| Redlich-Peterson | A(L/g)                  | 63249   | 0.997          | 0.027    | 0.572  | 0.456  | 0.047 | 0.240 |
|                  | B(L/mg)                 | 8838.12 |                |          |        |        |       |       |
|                  | β                       | 0.767   |                |          |        |        |       |       |
| Toth             | Q(mg/g)                 | 7.338   | 0.995          | 0.045    | 0.734  | 0.750  | 0.046 | 0.009 |
|                  | K <sub>e</sub>          | 0.009   |                |          |        |        |       |       |
|                  | N                       | 0.884   |                |          |        |        |       |       |
